# Supplementary material for: Are "Clean" Cosmetic Products Really Clean? A Pilot Study on the Validity of Cosmetic Labeling
Source: Research Square preprint supplement (doi:10.21203/rs.3.rs-917383/v2), 2021-12-08
Supplement: Supplementary file 1 [file c38c62b84ad44a4756f050bc.pdf]

## Appendix A

### List of Excluded Ingredients for Sephora's Clean Seal Verified Products *(Retrieved from Sephora.com)*

| Ingredient or Category:                               | Specific Requirement or Ingredient Names (does not include exhaustive ingredient lists):                                                                                                                                                                                                                                                                                                                                                                    |
|-------------------------------------------------------|-------------------------------------------------------------------------------------------------------------------------------------------------------------------------------------------------------------------------------------------------------------------------------------------------------------------------------------------------------------------------------------------------------------------------------------------------------------|
| Aluminum Salts                                        | Aluminum chloride, Aluminum chlorohydrate, Aluminum chlorohydrate, Aluminum dichlorohydrate, Aluminum sesquichlorohydrate, Aluminum zirconium octachlorohydrate, Aluminum zirconium octachlorohydrate gly, Aluminum zirconium pentachlorohydrate, Aluminum zirconium pentachlorohydrate gly, Aluminum zirconium tetrachlorohydrate, Aluminum zirconium tetrachlorohydrate gly, Aluminum zirconium trichlorohydrate, Aluminum zirconium trichlorohydrate gly |
| Animal Oils, Musks, and Fats                          | Excluding Beeswax, Honey, Lanolin and Carmine                                                                                                                                                                                                                                                                                                                                                                                                               |
| Benzophenones and related compounds                   |                                                                                                                                                                                                                                                                                                                                                                                                                                                             |
| Butoxyethanol                                         |                                                                                                                                                                                                                                                                                                                                                                                                                                                             |
| Butylated hydroxyanisole (BHA)                        |                                                                                                                                                                                                                                                                                                                                                                                                                                                             |
| Butylated hydroxytoluene (BHT)                        | Must be 0.1% or less of total formula                                                                                                                                                                                                                                                                                                                                                                                                                       |
| Carbon Black or Black 2                               |                                                                                                                                                                                                                                                                                                                                                                                                                                                             |
| Coal Tar                                              |                                                                                                                                                                                                                                                                                                                                                                                                                                                             |
| Ethanolamines                                         | Diethanolamine (DEA), Triethanolamine (TEA), Monoethanolamine (MEA), Ethanolamine (ETA)                                                                                                                                                                                                                                                                                                                                                                     |
| Formaldehyde and Formaldehyde-releasing agents        |                                                                                                                                                                                                                                                                                                                                                                                                                                                             |
| Hydroquinone                                          |                                                                                                                                                                                                                                                                                                                                                                                                                                                             |
| Lead and Lead Acetate                                 |                                                                                                                                                                                                                                                                                                                                                                                                                                                             |
| Mercury and Mercury Compounds (Thimerosal)            |                                                                                                                                                                                                                                                                                                                                                                                                                                                             |
| Methoxyethanol                                        |                                                                                                                                                                                                                                                                                                                                                                                                                                                             |
| Methyl Cellosolve                                     |                                                                                                                                                                                                                                                                                                                                                                                                                                                             |
| Methylchloroisothiazolinone and Methylisothiazolinone |                                                                                                                                                                                                                                                                                                                                                                                                                                                             |
| Mineral Oil                                           |                                                                                                                                                                                                                                                                                                                                                                                                                                                             |
| Nanomaterials                                         | Restrictions for nanomaterials listed in the Annex of cosmetic European regulation 1223/2009 including: Carbon black (CI 77266) – Annex IV, entry 126a, Methylene bis-benzotriazolyl tetramethylbutylphenol (MBBT) – Annex VI, entry 23a, Titanium Dioxide – Annex VI, entry 27a, Tris-biphenyl triazine – Annex VI, entry 29, Zinc Oxide – Annex VI, entry 30a                                                                                             |
| Oxybenzone                                            |                                                                                                                                                                                                                                                                                                                                                                                                                                                             |
| Parabens                                              |                                                                                                                                                                                                                                                                                                                                                                                                                                                             |
| Petrolatum and Paraffin                               | USP grade only                                                                                                                                                                                                                                                                                                                                                                                                                                              |

|                                 |                                                                                                                                                                                                                                                                                                                                                                                                                                                                                                                                                                |
|---------------------------------|----------------------------------------------------------------------------------------------------------------------------------------------------------------------------------------------------------------------------------------------------------------------------------------------------------------------------------------------------------------------------------------------------------------------------------------------------------------------------------------------------------------------------------------------------------------|
| Phenoxyethanol                  | Must be 1% or less of total formula                                                                                                                                                                                                                                                                                                                                                                                                                                                                                                                            |
| Phthalates                      |                                                                                                                                                                                                                                                                                                                                                                                                                                                                                                                                                                |
| Insoluble Plastic Microbeads    | No insoluble plastic microbeads (any intentionally added 5 mm or less, water insoluble, solid plastic particle used to cleanse or exfoliate) in rinse off products                                                                                                                                                                                                                                                                                                                                                                                             |
| Polyacrylamide and Acrylamide   |                                                                                                                                                                                                                                                                                                                                                                                                                                                                                                                                                                |
| Resorcinol                      |                                                                                                                                                                                                                                                                                                                                                                                                                                                                                                                                                                |
| Retinyl Palmitate               |                                                                                                                                                                                                                                                                                                                                                                                                                                                                                                                                                                |
| Styrene                         | Bromostyrene, Dea-styrene/acrylates/dvb copolymer, Sodium styrene/Divinylbenzene copolymer, Styrene oxide, Styrene                                                                                                                                                                                                                                                                                                                                                                                                                                             |
| Sulfates                        | Sodium Lauryl Sulfate (SLS) and Sodium Laureth Sulfate (SLES)                                                                                                                                                                                                                                                                                                                                                                                                                                                                                                  |
| Talc                            | Allowed provided that the brand conducts testing to ensure it is free of any asbestos                                                                                                                                                                                                                                                                                                                                                                                                                                                                          |
| Toluene                         |                                                                                                                                                                                                                                                                                                                                                                                                                                                                                                                                                                |
| Triclosan and Triclocarban      |                                                                                                                                                                                                                                                                                                                                                                                                                                                                                                                                                                |
| Undisclosed Synthetic Fragrance | Allowed providing it meets all of the formulated without list criteria, is cruelty-free, as well as the below additional criteria: 1) In skincare, makeup, and hair products only: synthetic fragrances allowed at concentrations below 1% of total formula, 2) In all product categories fragrance (whether a perfume product or “fragrance” or “parfum” listed on the label) is formulated without PTFE/PFOA, Acetaldehyde, Acetonitrile, Methylene chloride, Benzalkonium chloride, Acetone, Ethylenediaminetetraacetic acid (EDTA), and Bisphenol A (BPA). |
| 1,4 Dioxane                     | Must comply with the thresholds below in final formulas: 1) 10ppm or less for rinse off products (products meant to be rinsed off, wiped off or removed), 2) 2ppm or less for lip products and 7ppm or less for all other leave on products (products that are meant to remain on the skin)                                                                                                                                                                                                                                                                    |

## Appendix B

### List of Ingredients of Sampled Fragrance Products

| Clean Fragrance | EWG Score | Ingredients                                                                                                                                                                                                                                                                                                                                                                                                                                                            |
|-----------------|-----------|------------------------------------------------------------------------------------------------------------------------------------------------------------------------------------------------------------------------------------------------------------------------------------------------------------------------------------------------------------------------------------------------------------------------------------------------------------------------|
| Fragrance 1     | 4         | Organic Cane Sugar Alcohol, Distilled Water, Amyl Cinnamal, Benzyl Acetate, Cis-3-Hexenyl Salicylate, Dipropylene Glycol, Ethylene Brassylate, Geraniol, Geranyl Acetate, Citrus Paradisi (Grapefruit) Oil, Hexenyl Acetate, Hexyl Acetate, Chamomile Essential Oil, Ethyl Linalool, Hedione (Methyl Dihydrojasmonate), Terpeneol Allergens: Citronellol, Geraniol, Hydroxycitronellal, Limonene D, Linalool                                                           |
| Fragrance 2     | 8         | Alcohol, Aqua (water), Parfum (fragrance), Limonene, Tocopherol, Ethylhexyl Methoxycinnamate, BHT, Butyl Methoxydibenzoylmethane, Ethylhexyl Salicylate, Linalool, Citral, Geraniol, Citronellol                                                                                                                                                                                                                                                                       |
| Non-clean       |           |                                                                                                                                                                                                                                                                                                                                                                                                                                                                        |
| Fragrance 3     | 7         | Alcohol, Water, Benzyl Salicylate, Benzyl Alcohol, Hydroxycitronellal, Butyl Methoxydibenzoylmethane, Hexyl Cinnamal, Limonene, Linalool, Geraniol, Citronellol, Cinnamyl Alcohol, Methyl Anthranilate, Amyl Cinnamal, Citral, Coumarin, Benzyl Benzoate, Ci 15985 / Yellow 6, Ci 17200 / Red 33                                                                                                                                                                       |
| Fragrance 4     | 3         | #11057/A Alcohol, Parfum (Fragrance), Aqua (Water), Butylphenyl Methylpropional, Benzyl Salicylate, Hexyl Cinnamal, Hydroxycitronellal, Citronellol, Ethylhexyl Methoxycinnamate, Alpha-Isomethyl Ionone, Limonene, Linalool, Butyl Methoxydibenzoylmethane, Ethylhexyl Salicylate, Geraniol, Bht, Benzyl Benzoate, Citral, Cinnamyl Alcohol, Benzyl Cinnamate, Benzyl Alcohol, Farnesol, Tocopherol, Ci 14700 (Red 4), Ci 19140 (Yellow 5), Ci 60730 (Ext. Violet 2). |
| Fragrance 5     | 8         | Alcohol Denat. (Sd Alcohol 39-C), Water, Fragrance, Butyl Methoxydibenzoylmethane, Ethylhexyl Methoxycinnamate, Ethylhexyl Salicylate, Alpha-Isomethyl Ionone, Citral, Citronellol, Coumarin, Limonene, Geraniol, Hexyl Cinnamal, Linalool, Bht.                                                                                                                                                                                                                       |
| Fragrance 6     | 8         | Alcohol Denat., Fragrance, Water, Linalool, Ethylhexyl Methoxycinnamate, Benzyl Alcohol, Ethylhexyl Salicylate, Butyl Methoxydibenzoylmethane, Limonene, Evernia Prunastri/Oakmoss Extract, Benzyl Benzoate, Geraniol.                                                                                                                                                                                                                                                 |
